# Supplementary material for: Theoretical screening of single atom doping on β-Ga2O3 (100) for photoelectrochemical water splitting with high activity and low limiting potential
Source: Royal Society of Chemistry journal article supplement (doi:10.1039/d3nr00149k), 2023-01-01
Supplement: d3nr00149k1.pdf [file d3nr00149k1.pdf]

## Supporting information

### **Theoretical Screening of Single Atom Doping on $\beta$ -Ga<sub>2</sub>O<sub>3</sub> (100) for Photoelectrochemical Water Splitting with High Activity and Low Limiting Potential**

Sijia Fu,<sup>a</sup> David Lewis,<sup>a</sup> Philip van Eyk,<sup>a</sup> Petar Atanckovic,<sup>b</sup> and Yan Jiao<sup>\*a</sup>

<sup>a</sup> School of Chemical Engineering and Advanced Materials, Faculty of Science, Engineering and Technology, The University of Adelaide, Adelaide, South Australia, 5005, Australia.

[yan.jiao@adelaide.edu.au](mailto:yan.jiao@adelaide.edu.au)

<sup>b</sup> Silanna picoFAB Facility, The University of Adelaide, Adelaide, South Australia, 5005, Australia.

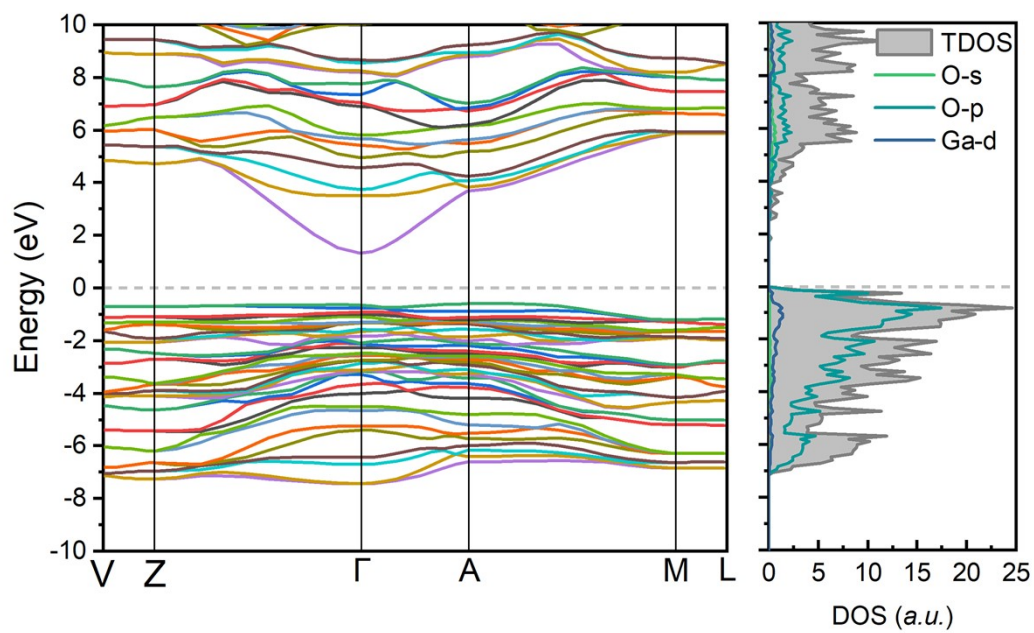

**Figure S1** GGA band structure, TDOS and POS analysis of  $\beta$ -Ga<sub>2</sub>O<sub>3</sub> unit cell. The top of the valence band is aligned to zero.

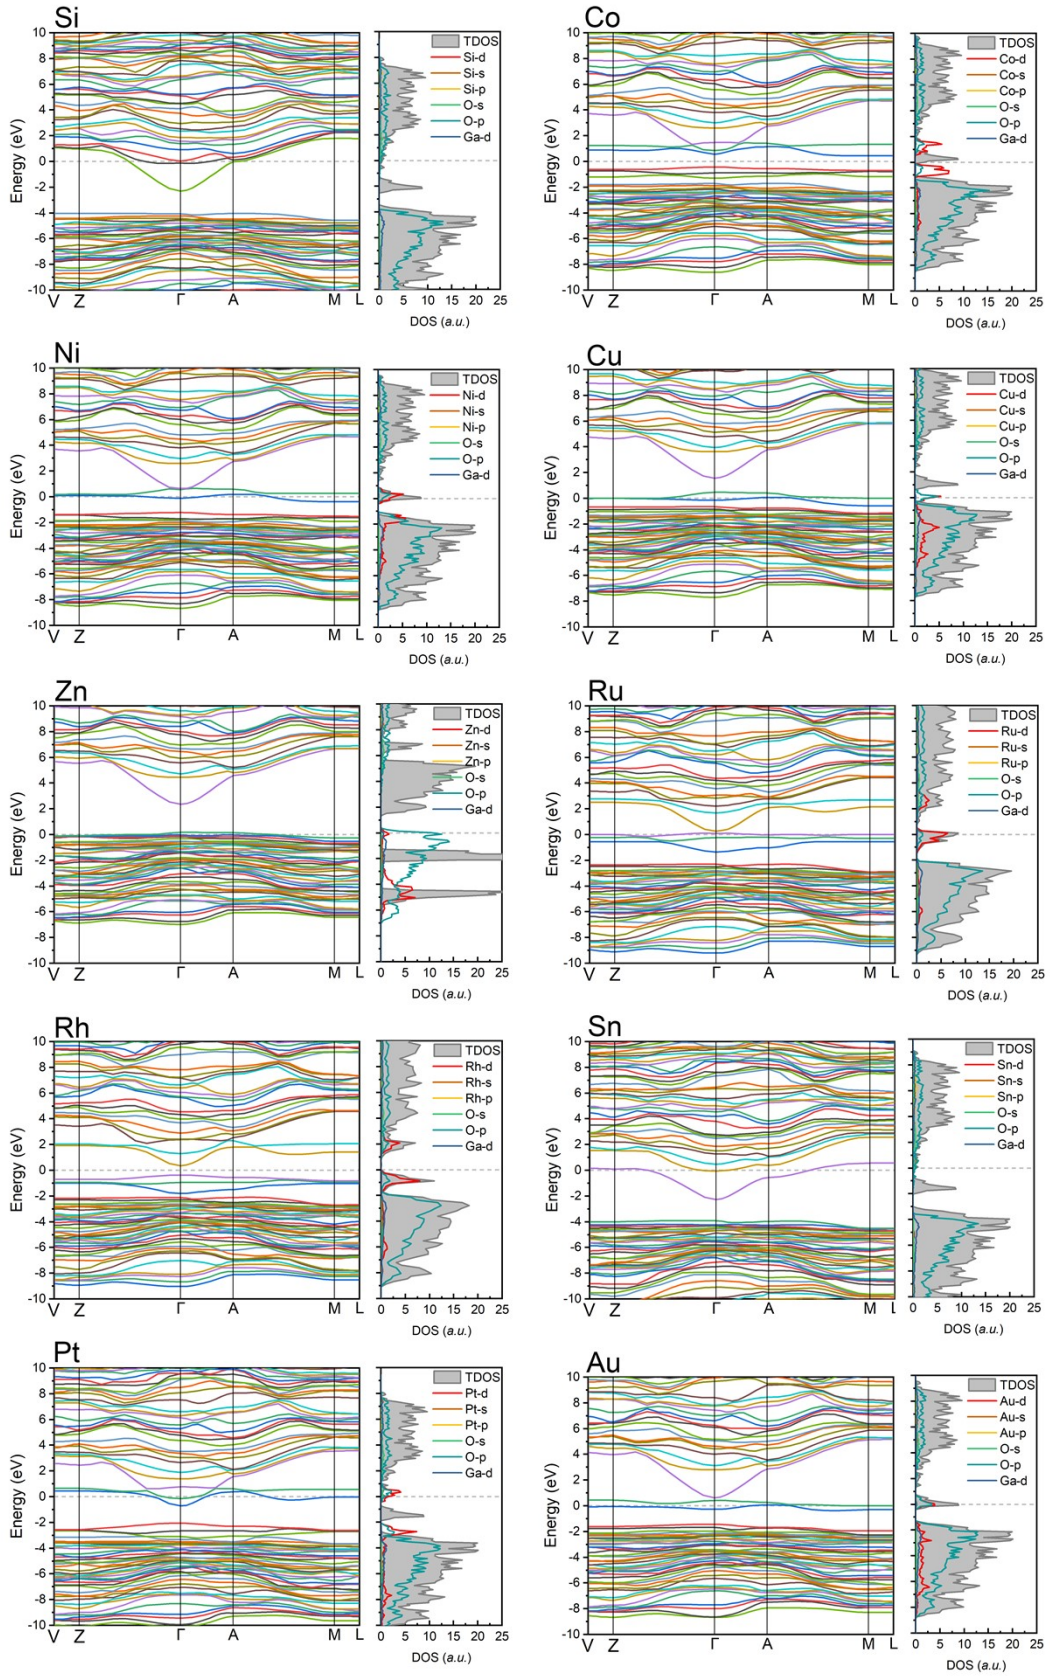

**Figure S2** GGA band structure and TDOS and POS analysis of all doped structures.

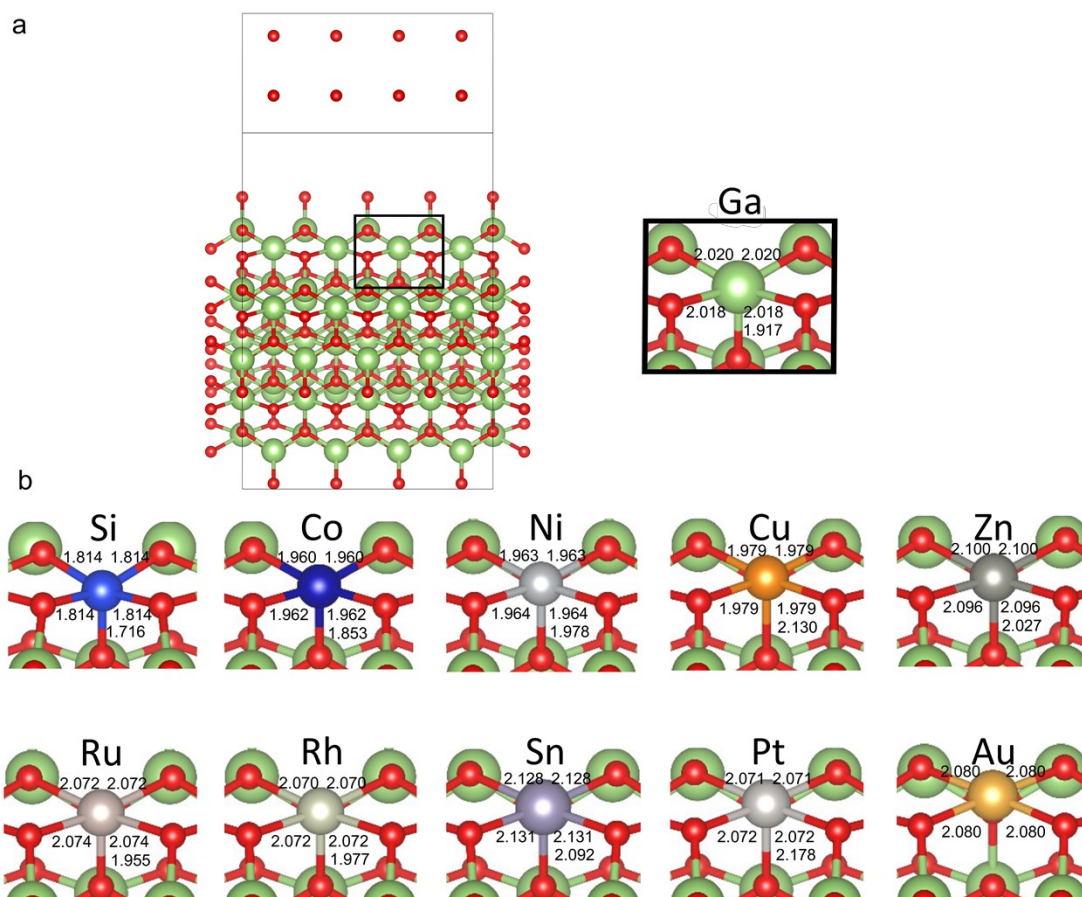

**Figure S3** (a) Schematic representation of (100)  $\beta$ -Ga<sub>2</sub>O<sub>3</sub> surface. Colour code: Ga, green; O, red. The local structure of Ga is shown in the black box with the bond length. (b) The local structures of other doped structures.

**Table S1 Summary of the studied on doped gallium oxide materials.**

| <b>Year</b> | <b>Material</b>                                                | <b>Method</b> | <b>Research aspect</b>                                                                                                                     | <b>ref</b> |
|-------------|----------------------------------------------------------------|---------------|--------------------------------------------------------------------------------------------------------------------------------------------|------------|
| 2012        | Zn doped $\beta$ -Ga <sub>2</sub> O <sub>3</sub>               | Computation   | Electronic structures, and absorption and reflectivity in the UV region                                                                    | 1          |
| 2012        | Zn doped Ga <sub>2</sub> O <sub>3</sub>                        | Experiment    | The effect of different Zn doping concentration in photocatalytic hydrogen production                                                      | 2          |
| 2012        | Zn doped $\beta$ -Ga <sub>2</sub> O <sub>3</sub> films         | Experiment    | The microstructure, optical transmittance, optical absorption, optical energy gap, and photoluminescence                                   | 3          |
| 2013        | Si doped $\beta$ -Ga <sub>2</sub> O <sub>3</sub>               | Experiment    | Application in fabrication of low-resistance ohmic contacts                                                                                | 4          |
| 2013        | 1D nanoporous Zn doped Ga <sub>2</sub> O <sub>3</sub>          | Experiment    | Application in photocatalytic hydrogen production                                                                                          | 5          |
| 2013        | Zn and Pb                                                      | Experiment    | Application in photocatalytic hydrogen production                                                                                          | 6          |
| 2015        | Non-metal doping                                               | Computation   | The photocatalytic redox ability for doped systems                                                                                         | 7          |
| 2017        | Al doped $\beta$ -Ga <sub>2</sub> O <sub>3</sub>               | Computation   | The effects of intrinsic defects on electronic structures and optical properties                                                           | 8          |
| 2017        | Ca/La/Ti doped $\beta$ -Ga <sub>2</sub> O <sub>3</sub>         | Computation   | Geometrical structures and electronic properties                                                                                           | 9          |
| 2018        | Rh doped $\beta$ -Ga <sub>2</sub> O <sub>3</sub>               | Experiment    | Application in photocatalytic CO <sub>2</sub> reduction                                                                                    | 10         |
| 2019        | N doped $\beta$ -Ga <sub>2</sub> O <sub>3</sub>                | Computation   | The effects of the doping concentration on the electronic and optical properties                                                           | 11         |
| 2021        | Sr doped $\beta$ -Ga <sub>2</sub> O <sub>3</sub>               | Computation   | The effect of Sr doping in Ga <sub>2</sub> O <sub>3</sub> as p-type doping based on its material properties in the simulation structure    | 12         |
| 2021        | Al doped $\beta$ -Ga <sub>2</sub> O <sub>3</sub> nanostructure | Experiment    | The effects of Al doping on hydrothermal synthesized $\beta$ -Ga <sub>2</sub> O <sub>3</sub> nanostructures for photocatalyst applications | 13         |
| 2021        | Zn and Ca doped $\beta$ -Ga <sub>2</sub> O <sub>3</sub>        | Experiment    | The effects of core-shell double doping on enhancing photocatalytic activity for hydrogen production                                       | 14         |

**Table S2** The free energies of the most stable configurations for all the adsorbents on doping structures and pure  $\beta$ -Ga<sub>2</sub>O<sub>3</sub> 100 surface.

|               | <b>Slab (eV)</b> | <b>*OH (eV)</b> | <b>*O (eV)</b> | <b>*OOH (eV)</b> |
|---------------|------------------|-----------------|----------------|------------------|
| <b>Si</b>     | -975.25          | -986.68         | -980.24        | -990.68          |
| <b>Co</b>     | -972.89          | -983.01         | -977.26        | -987.71          |
| <b>Ni</b>     | -970.96          | -980.94         | -974.67        | -985.70          |
| <b>Cu</b>     | -968.59          | -977.52         | -971.16        | -982.51          |
| <b>Zn</b>     | -967.47          | -975.79         | -969.17        | -980.94          |
| <b>Ru</b>     | -974.56          | -985.94         | -981.63        | -990.76          |
| <b>Rh-Ga1</b> | -972.89          | -983.60         | -978.20        | -988.22          |
| <b>Rh-Ga2</b> | -970.93          | -981.97         | -976.37        | -986.14          |
| <b>Sn</b>     | -971.80          | -983.39         | -976.61        | -987.38          |
| <b>Pt</b>     | -970.81          | -982.11         | -976.16        | -986.33          |
| <b>Au</b>     | -967.66          | -976.79         | -970.92        | -980.91          |
| <b>Ga</b>     | -971.91          | -982.53         | -974.01        | -985.56          |

## Reference

1. L. Chao, Y. Jin-Liang, Z. Li-Ying and Z. Gang, *Chinese Physics B*, 2012, **21**, 127104.
2. K. Shimura and H. Yoshida, *Physical Chemistry Chemical Physics*, 2012, **14**, 2678-2684.
3. Y. Wei, Y. Jinliang, W. Jiangyan and Z. Liying, *Journal of Semiconductors*, 2012, **33**, 073003.
4. K. Sasaki, M. Higashiwaki, A. Kuramata, T. Masui and S. Yamakoshi, *Applied Physics Express*, 2013, **6**, 086502.
5. N. K. Shrestha, K. Lee, R. Kirchgeorg, R. Hahn and P. Schmuki, *Electrochemistry communications*, 2013, **35**, 112-115.
6. X. Wang, S. Shen, S. Jin, J. Yang, M. Li, X. Wang, H. Han and C. Li, *Physical Chemistry Chemical Physics*, 2013, **15**, 19380-19386.
7. W. Guo, Y. Guo, H. Dong and X. Zhou, *Physical Chemistry Chemical Physics*, 2015, **17**, 5817-5825.
8. X. Ma, Y. Zhang, L. Dong and R. Jia, *Results in physics*, 2017, **7**, 1582-1589.
9. X. Qiu, J. Zhang, H. Dong and X. Zhou, *Theoretical Chemistry Accounts*, 2017, **136**, 1-7.
10. S. Kikkawa, K. Teramura, H. Asakura, S. Hosokawa and T. Tanaka, *The Journal of Physical Chemistry C*, 2018, **122**, 21132-21139.
11. Z.-C. Zhao, C.-L. Yang, Q.-T. Meng, M.-S. Wang and X.-G. Ma, *Spectrochimica Acta Part A: Molecular and Biomolecular Spectroscopy*, 2019, **211**, 71-78.
12. L. Kean Ping, M. A. Mohamed, A. Kumar Mondal, M. F. Mohamad Taib, M. H. Samat, D. D. Berhanuddin, P. S. Menon and R. Bahru, *Micromachines*, 2021, **12**, 348.
13. S. Kim, H. Ryou, I. G. Lee, M. Shin, B. J. Cho and W. S. Hwang, *RSC Advances*, 2021, **11**, 7338-7346.
14. A. Yamakata, J. J. M. Vequizo, T. Ogawa, K. Kato, S. Tsuboi, N. Furutani, M. Ohtsuka, S. Muto, A. Kuwabara and Y. Sakata, *ACS Catalysis*, 2021, **11**, 1911-1919.
